# Supplementary material
Source: PubMed Central journal article supplement (PMC3397903)
Supplement: supp_M111.329763_jbc.M111.329763-1.pdf [file supp_M111.329763_jbc.M111.329763-1.pdf]

# CONFORMATIONAL DIFFERENCES BETWEEN TWO AMYLOID $\beta$ OLIGOMERS OF SIMILAR SIZE AND DISSIMILAR TOXICITY

Ali Reza A. Ladiwala<sup>1</sup>, Jeffrey Litt<sup>1</sup>, Ravi S. Kane<sup>1</sup>, Darryl S. Aucoin<sup>2</sup>, Steven O. Smith<sup>2</sup>, Swarnim Ranjan<sup>1</sup>, Judianne Davis<sup>3</sup>, William E. Van Nostrand<sup>3</sup>, and Peter M. Tessier<sup>1</sup>

From <sup>1</sup>Department of Chemical & Biological Engineering, Center for Biotechnology & Interdisciplinary Studies, Rensselaer Polytechnic Institute, Troy, New York 12180, <sup>2</sup>Department of Biochemistry and Cell Biology, Stony Brook University, Stony Brook, New York 11794, and <sup>3</sup>Department of Neurosurgery and Medicine, Stony Brook University, Stony Brook, New York 11794

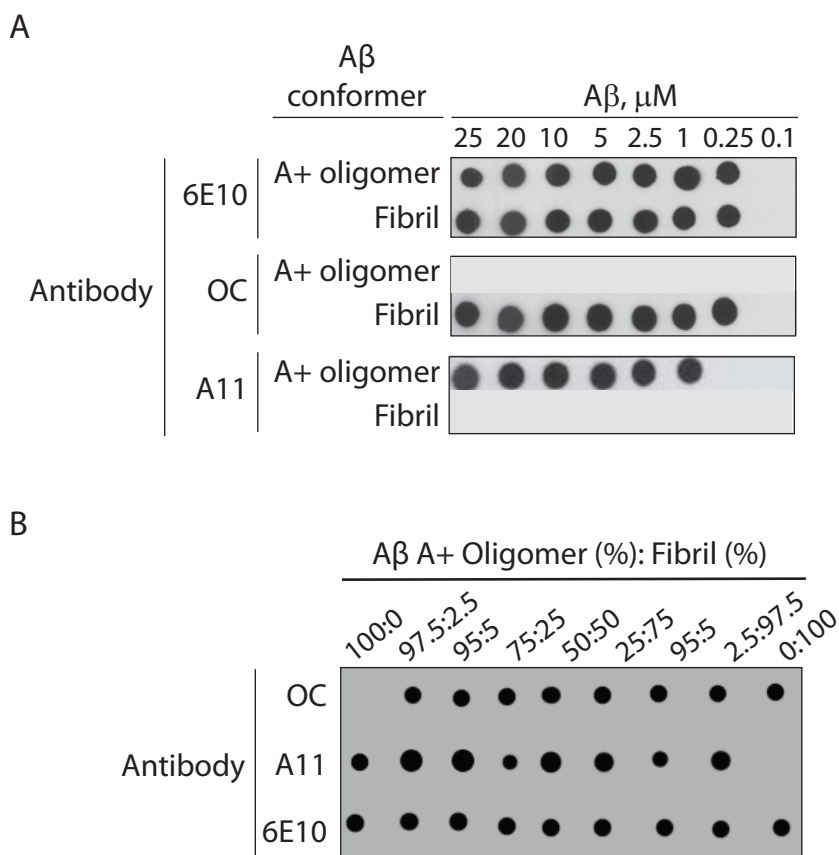

**FIGURE S1. Conformation-specific antibody detection sensitivity of A $\beta$  conformers.** A $\beta$ 42 A+ oligomers and fibrils (25  $\mu$ M) were deposited (A) alone or (B) as mixtures on nitrocellulose, and detected using conformation-specific antibodies (A11, prefibrillar oligomers; OC, fibrillar conformers) and a sequence-specific antibody (6E10, N-terminus of A $\beta$ ).

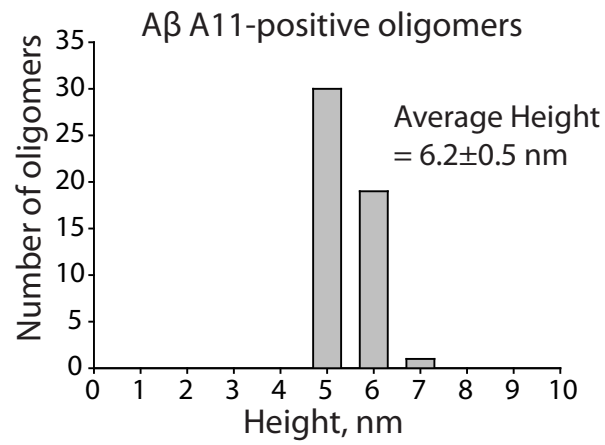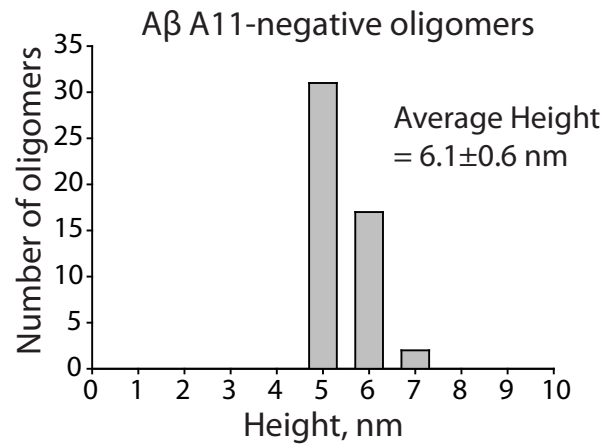

**FIGURE S2. Height distributions of A $\beta$  oligomers.** A $\beta$ 42 oligomers (25  $\mu$ M) were assembled without agitation, deposited on mica substrates, imaged using AFM, and the heights were measured using MFP 3D software (Asylum Research).

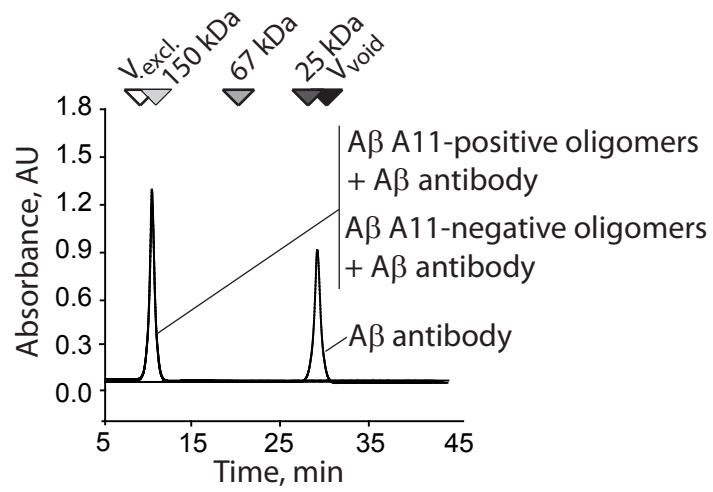

**Figure S3. SEC analysis of A $\beta$  oligomers.** A $\beta$ 42 oligomers (25  $\mu$ M) were complexed with a domain antibody specific for A $\beta$ , and analyzed using size-exclusion chromatography.

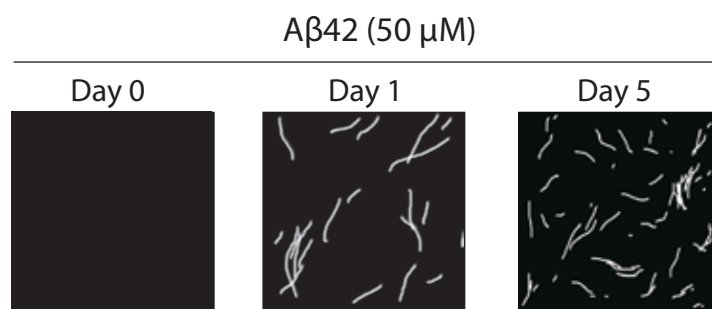

**FIGURE S4. AFM analysis of A $\beta$  fibrillization.** A $\beta$ 42 (50  $\mu$ M) was assembled without agitation, deposited on mica substrates, and imaged using AFM. Each image is 3x3  $\mu$ m.

A

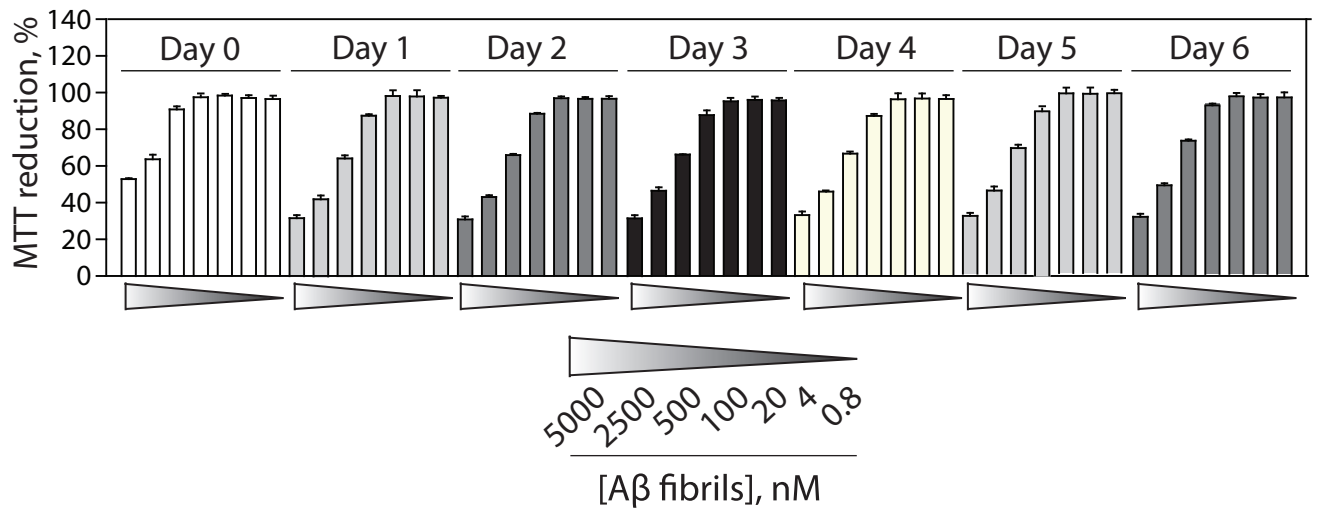

B

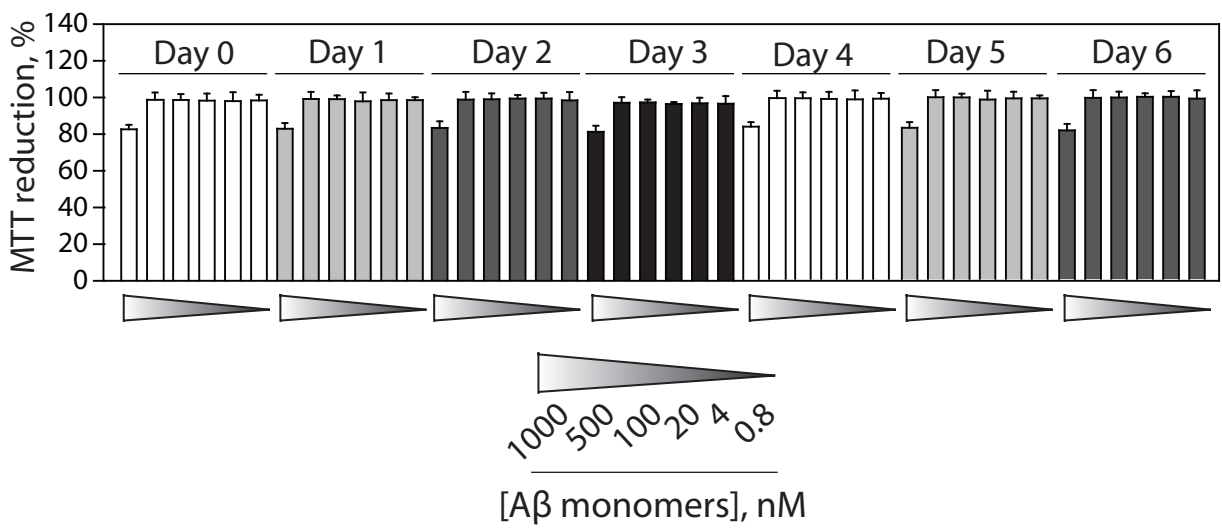

**FIGURE S5. Toxicity analysis of Aβ monomers and fibrils.** Aβ42 was assembled at (A) 50 μM and (B) 10 μM without agitation, added to PC12 cells at a range of Aβ concentrations (0.8-5000 nM), and the relative toxicity was evaluated (n=3).

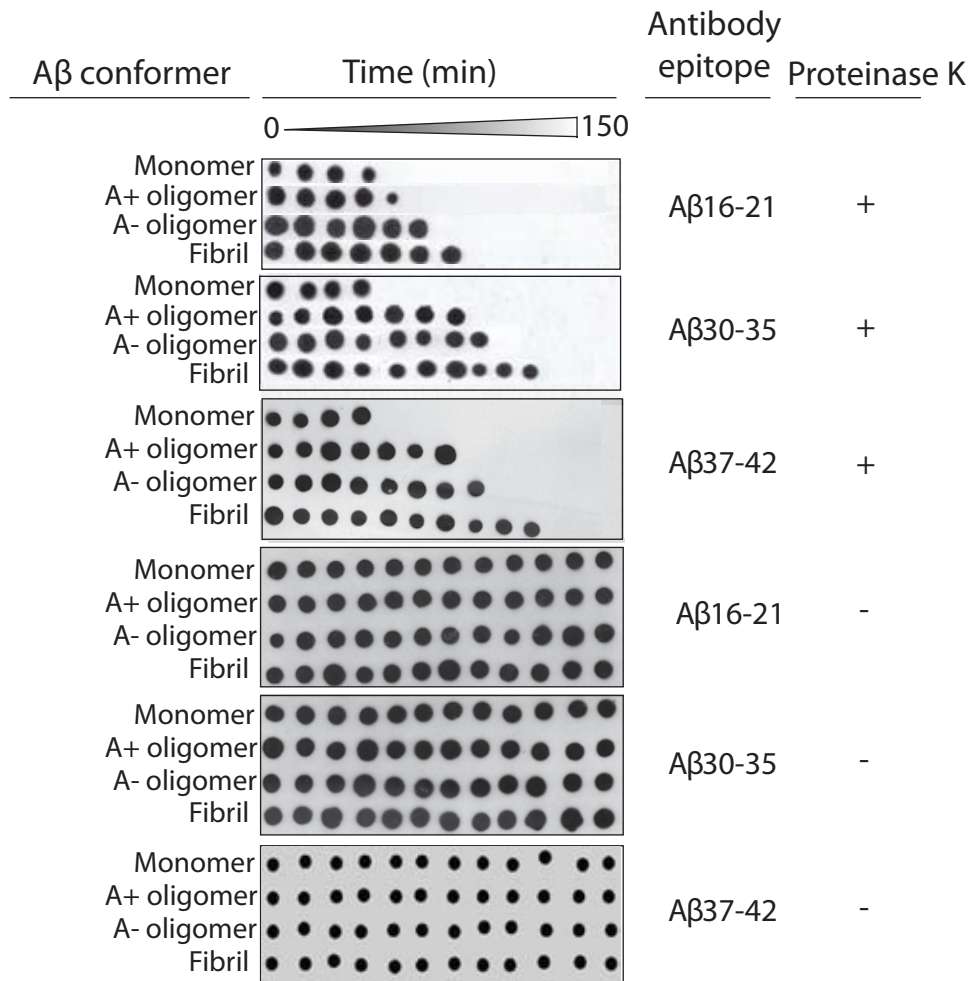

**FIGURE S6. Rate of proteolytic fragmentation of A $\beta$  peptide segments within A $\beta$  oligomers.** A $\beta$ 42 (25  $\mu$ M) was incubated with Proteinase K (0.5  $\mu$ g/mL), deposited periodically on nitrocellulose (every 10-30 min), and probed with antibodies specific for central (A $\beta$ 16-21) and C-terminal (A $\beta$ 30-35 and A $\beta$ 37-42) A $\beta$  peptide segments. The time intervals were 0, 10, 20, 30, 40, 50, 60, 70, 80, 90, 120 and 150 min.

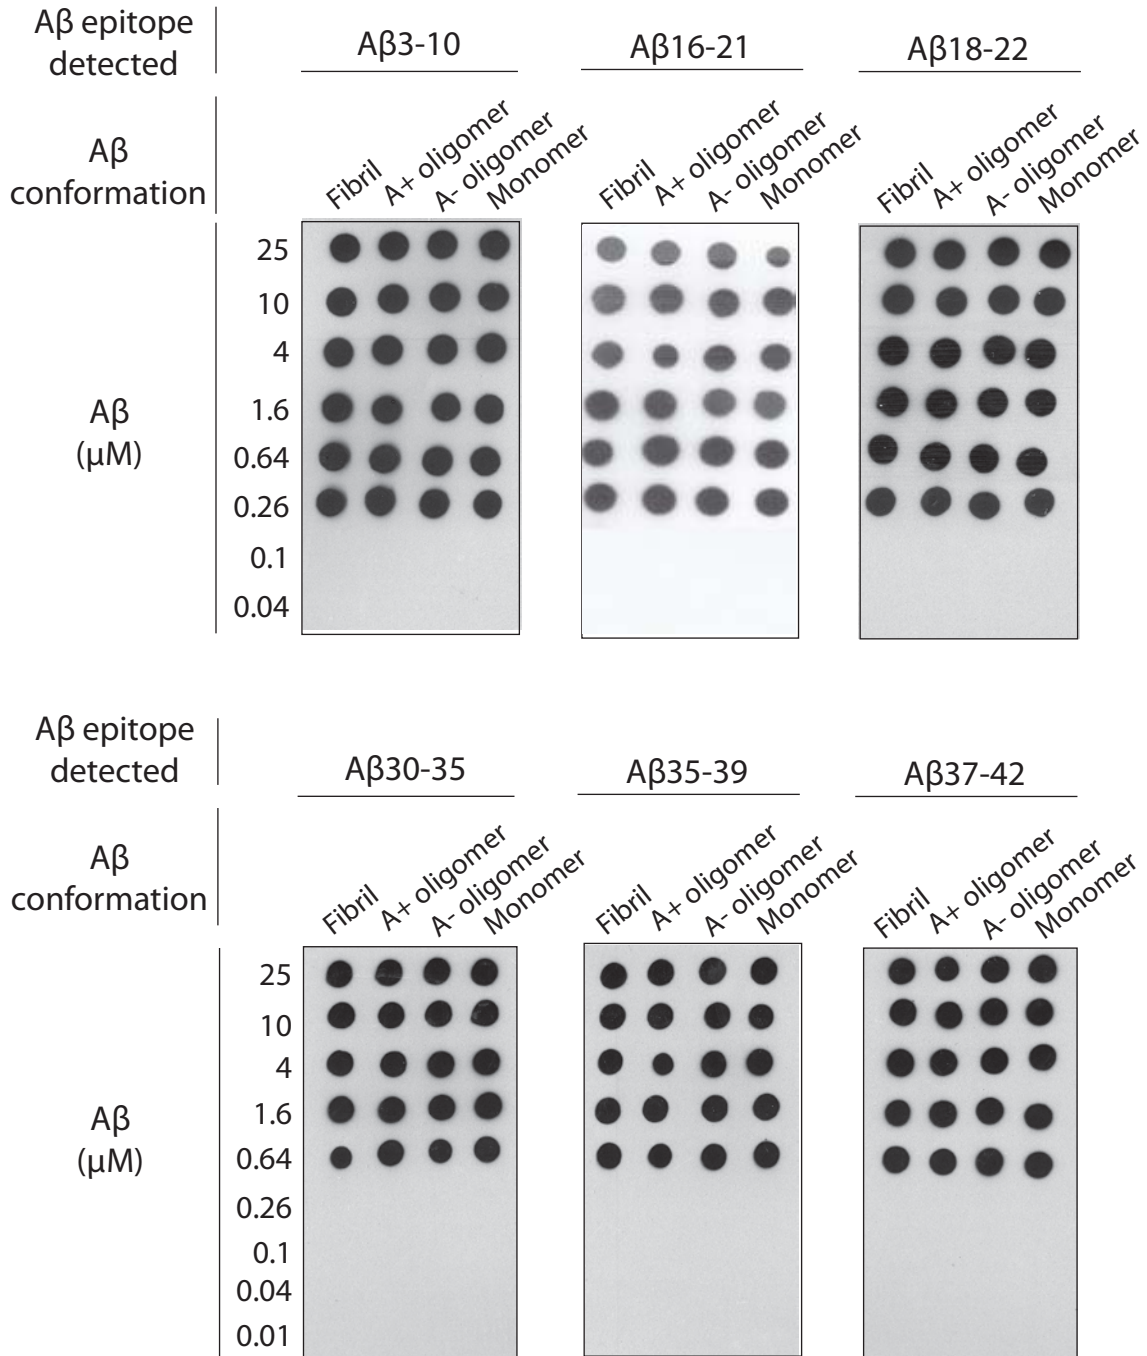

**FIGURE S7. Sequence-specific antibody detection sensitivity of A $\beta$  conformers.** A $\beta$ 42 (25  $\mu$ M) was diluted and deposited on nitrocellulose, and then detected using sequence-specific antibodies against epitopes distributed throughout A $\beta$ .

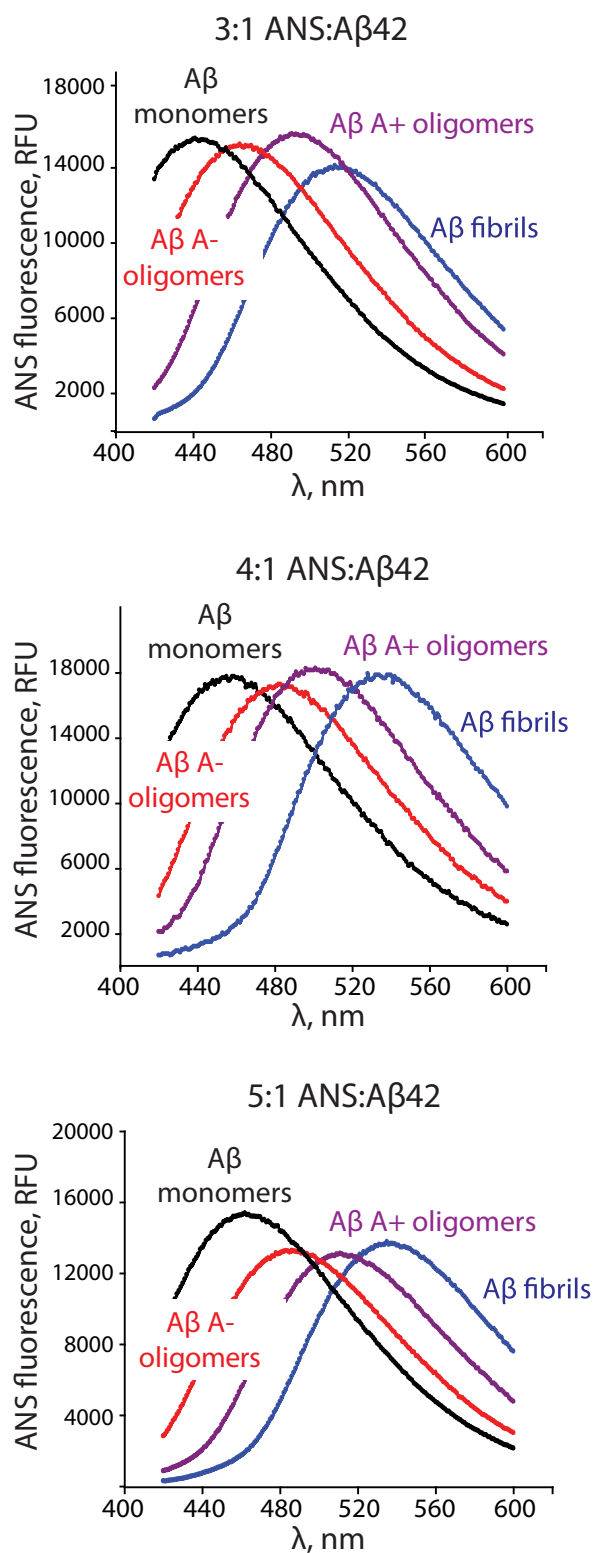

**FIGURE S8. ANS fluorescence analysis of Aβ conformers.** Aβ42 (2.5 μM) was combined with 8-anilino-naphthalene-1-sulfonate (ANS) in three molar ratios (3:1 to 5:1 ANS:Aβ), and the fluorescence spectra of each Aβ conformer was evaluated. The excitation wavelength was 380 nm.



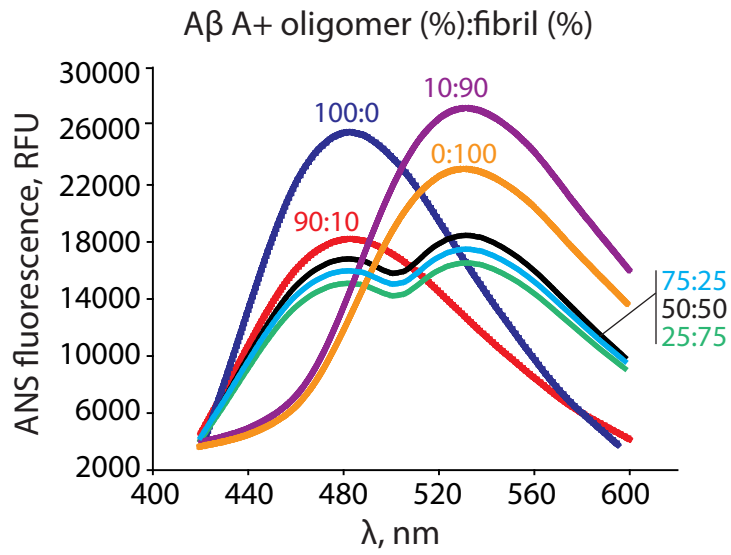

**FIGURE S9. ANS fluorescence analysis of the homogeneity of A $\beta$  conformers.** A $\beta$ 42 A+ oligomers and fibrils were combined in different ratios, and their ANS spectra was measured (excitation at 380 nm). The molar ratio of ANS:A $\beta$  was 4:1.

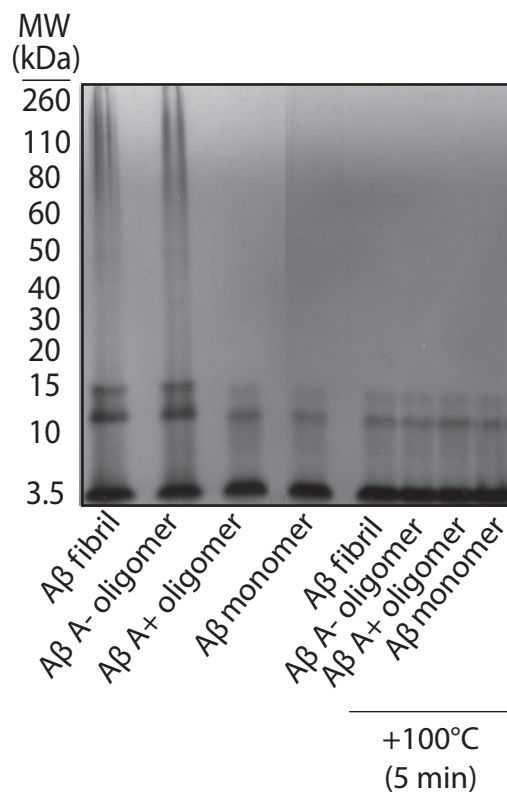

**FIGURE S10. SDS-PAGE analysis of A $\beta$  conformers.** A $\beta$ 42 (25  $\mu$ M) was added to LDS sample buffer, and analyzed via SDS-PAGE (10% bis-tris gels). As a loading control, each A $\beta$  conformer was heated (100  $^{\circ}$ C, 5 min) prior to SDS-PAGE analysis. A $\beta$  was visualized via silver stain.
